# Supplementary material for: Identification of RyR2-PBmice and the effects of transposon insertional mutagenesis of the RyR2 gene on cardiac function in mice
Source: PeerJ. 2019 May 16;7:e6942. doi: 10.7717/peerj.6942 (PMC6526016; doi:10.7717/peerj.6942)
Supplement: Dataset S1 [file peerj-07-6942-s001.xlsx]

## Sheet: Sheet1
Basal 15min，Iso and café 30min
										data processing（%）
WT	No.1	No.2	No.3	No.4	No.5	No.6	average	STDEV		WT	No.1	No.2	No.3	No.4	No.5	No.6	average	STDEV				45
0	267.3	300.75	347.83	380.15	349.34	334.82	330.032	40.0426		0	100	100	100	100	100	100	100	6.35529e-15
5	286.4	373.13	272.73	358.42	296.42	328.14	319.207	40.696		5	107.146	124.067	78.409	94.2838	84.8514	98.0049	97.7935	16.33
10	392.16	376.88	286.78	314.14	313.46	400.89	347.385	48.3045		10	146.712	125.313	82.4483	82.6358	89.7292	119.733	107.762	26.7047
15	285.37	354.51	333.8	298.51	334.99	383.39	331.762	35.9316		15	106.76	117.875	95.9664	78.5243	95.8923	114.506	101.587	14.5251
20	304.57	338.6	350.36	395.93	376.96	344.83	351.875	31.7365		20	113.943	112.585	100.727	104.151	107.906	102.99	107.05	5.36197
25	290.21	262.86	361.88	269.97	366.75	346.32	316.332	47.3433		25	108.571	87.4015	104.039	71.0167	104.984	103.435	96.5745	14.5242
30	275.86	306.51	357.57	257.51	354.61	338.22	315.047	42.0225		30	103.202	101.915	102.8	67.7391	101.509	101.015	96.3635	14.0463
35	269.06	312.91	353.77	247.93	349.65	332.23	310.925	43.6216		35	100.658	104.043	101.708	65.219	100.089	99.2265	95.1573	14.7601
40	266.37	318.47	351.7	291.08	346.32	328.32	317.043	32.9524		40	99.6521	105.892	101.113	76.5698	99.1355	98.0587	96.7368	10.2535
45	260.49	320.43	358	244.57	343.84	324.32	308.608	45.7902		45	97.4523	106.544	102.924	64.3351	98.4256	96.864	94.4241	15.2027
PB	No.1	No.2	No.3	No.4	No.5	No.6	average	STDEV		PB	No.1	No.2	No.3	No.4	No.5	No.6	average	STDEV
0	388.12	421.94	328.01	370.95	348.37	333.46	365.142	35.9209		0	100	100	100	100	100	100	100	0
5	461.54	383.14	370.77	364.52	422.04	358.62	393.438	40.3098		5	118.917	90.8044	113.036	98.2666	121.147	107.545	108.286	11.8956
10	375.55	350.06	328.43	323.16	400	299.78	346.163	36.8027		10	96.7613	82.9644	100.128	87.1169	114.82	89.8998	95.2818	11.4436
15	370.91	322.15	366.67	288.46	383.14	299.12	338.408	40.3949		15	95.5658	76.3497	111.786	77.7625	109.981	89.7019	93.5245	15.2741
20	395.26	367.65	365.75	355.45	398	334.73	369.473	24.0818		20	101.84	87.1332	111.506	95.8215	114.246	100.381	101.821	10.0198
25	395.6	384.62	279.78	338.98	340.91	344.04	347.322	41.0007		25	101.927	91.1551	85.2962	91.3816	97.8586	103.173	95.1319	6.9984
30	378.79	375.47	250.16	341.88	334.73	346.32	337.892	46.6446		30	97.5961	88.9866	76.266	92.1634	96.0846	103.857	92.4922	9.42116
35	293.76	371.75	384.08	333.33	336.7	347.62	344.54	31.8717		35	75.6879	88.1049	117.094	89.8585	96.6501	104.246	95.2736	14.3028
40	349.65	368.1	265.67	335.2	321.72	348.43	331.462	35.773		40	90.0881	87.2399	80.9945	90.3626	92.3501	104.489	90.9207	7.73606
45	345.22	366.6	247.04	339.46	326.98	359.71	330.835	43.4297		45	88.9467	86.8844	75.3148	91.511	93.86	107.872	90.7315	10.5816
