# Supplementary material for: Identification of RyR2-PBmice and the effects of transposon insertional mutagenesis of the RyR2 gene on cardiac function in mice
Source: PeerJ. 2019 May 16;7:e6942. doi: 10.7717/peerj.6942 (PMC6526016; doi:10.7717/peerj.6942)
Supplement: Dataset S3 — The basal and soproterenol (ISO) evoked [Ca2+]i transients in WTmice and RyR2-PBmice cardiomyocytes, the fluorescence values (F) were normalized by the basal fluorescence (F0) in order to obtain the fluorescence ratio (F/F0). [file peerj-07-6942-s003.xlsx]

## Sheet: Sheet1
		No.1	No.2	No.3	No.4	No.5	No.6
PB basal	F value	3504.57	2912.59	3189.89	3793.19	1416.69	2714.77
WT basal	F value	4064.5	2006.55	3644.27	1609.31	2107.81	1664.17
PB after Iso	F value	1940.32	4094.92	2901.97	3826.14	3458.42	1781.92
WT after Iso	F value	3253.2	2404.84	3403.27	2089.25	2228.62	3778.41
		No.1	No.2	No.3	No.4	No.5	No.6
PB basal	F 0	894.919	682.585	859.024	1350.13	524.342	949.72
WT basal	F 0	692.987	414.59	919.713	318.932	358.175	323.551
PB after Iso	F 0	415.541	867.428	680.399	839.986	691.956	323.062
WT after Iso	F 0	468.017	313.056	456.027	336.146	319.184	618.49
		No.1	No.2	No.3	No.4	No.5	No.6	Average	STDEV
PB basal	F/F0	3.91607	4.267	3.71339	2.8095	2.70184	2.85849	3.37772	0.669715
WT basal	F/F0	5.86519	4.83984	3.9624	5.04592	5.88486	5.14345	5.12361	0.716211
PB after Iso	F/F0	4.66939	4.72076	4.26511	4.55501	4.99804	5.51572	4.78734	0.428949
WT after Iso	F/F0	6.95104	7.68182	7.46289	6.2153	6.98224	6.1091	6.9004	0.637464
		PB basal	WT basal	PB after Iso	WT after Iso
		3.91607	5.86519	4.66939	6.95104
		4.267	4.83984	4.72076	7.68182
		3.71339	3.9624	4.26511	7.46289
		2.8095	5.04592	4.55501	6.2153
		2.70184	5.88486	4.99804	6.98224
		2.85849	5.14345	5.51572	6.1091
