# Supplementary material for: Identification of RyR2-PBmice and the effects of transposon insertional mutagenesis of the RyR2 gene on cardiac function in mice
Source: PeerJ. 2019 May 16;7:e6942. doi: 10.7717/peerj.6942 (PMC6526016; doi:10.7717/peerj.6942)
Supplement: Dataset S4 — ATP concentration in myocardial tissue of WTmice and RyR2-PBmice. [file peerj-07-6942-s004.xlsx]

## Sheet: Luminescence 1_01
Measurement results
New Session (6)
Luminescence 1
Wavelength: 0 nm
Plate 1
RLU	1	2	3	4	5	6
A	415.2	658.7		3443		4557
B	427.7	631.5		3114		4436
C	434.5	653.7		3338		4639
D
E	902	794.3	936.6	1128	1003	850.9
F	869.8	759.9	843.6	1233	1291	945.1
G	608.6	595.9	682.1	619.1	714.9	604.4
H	633.1	632.5	607.2	532.4	594.6	659.7
	standard curve line	0.01	0.03	0.1	0.3	1	3	10	μmol/L
		415.2	658.7	3443	4557	27620	63960	316400
		427.7	631.5	3114	4436	28540	59320	361900
		434.5	653.7	3338	4659	26942	65546	344398
	A	425.8	647.967	3298.33	4550.67	27700.7	62942	340899
Hearts
	No.1	No.2	No.3	No.4	No.5	No.6	Average	STDEV
WT OD	902	794.3	936.6	1128	1003	850.9
	869.8	759.9	843.6	1233	1291	945.1
WT OD average	885.9	777.1	890.1	1180.5	1147	898
concentration (μmol/L)	0.230148	0.226934	0.230272	0.238851	0.237861	0.230505
pro concentration (mg/ml)	1.30874	1.15652	1.23068	1.30484	1.42194	1.29703
ATP concentration (nmol/mg)	0.175854	0.196221	0.18711	0.18305	0.16728	0.177717	0.181205	0.00998465
PB OD	608.6	595.9	682.1	619.1	714.9	604.4
	633.1	632.5	607.2	532.4	594.6	659.7
PB OD average	620.85	614.2	644.65	575.75	654.75	632.05
concentration (μmol/L)	0.222318	0.222121	0.223021	0.220985	0.223319	0.222648
pro concentration (mg/ml)	1.66003	1.31655	1.7381	1.53903	1.48439	1.20726
ATP concentration (nmol/mg)	0.133924	0.168715	0.128313	0.143587	0.150445	0.184425	0.151568	0.0214038
		WTmice ATP concentration (nmol/mg)	PBmice ATP concentration (nmol/mg)
		0.175854	0.133924
		0.196221	0.168715
		0.18711	0.128313
		0.18305	0.143587
		0.16728	0.150445
		0.177717	0.184425
