# Supplementary material for: Identification of RyR2-PBmice and the effects of transposon insertional mutagenesis of the RyR2 gene on cardiac function in mice
Source: PeerJ. 2019 May 16;7:e6942. doi: 10.7717/peerj.6942 (PMC6526016; doi:10.7717/peerj.6942)
Supplement: Dataset S5 — Quantitative RT-PCR analysis of RyR2 mRNA and the related signaling pathway coding sequences in WTmice and RyR2-PBmice. [file peerj-07-6942-s005.xlsx]

## Sheet: 表达量推导
ΔCt
No.	Name	Groups	Ryr2	Gnb3	Cox8b	Gpr37l1	Cdh11	Micu3	mt-Co2	mt-Atp6	mt-Co3	Nppb	Ucp3
1	WTX1	control-1	-0.686667	3.17	-4.15333	5.14333	3.43333	5.98667	-8.96667	-9.86	-8.95	-3.77	0.95
2	WTX2	control-2	-0.513333	4.39	-3.71333	8.49667	4.50667	7.94667	-8.52333	-9.44	-8.49333	-3.81333	2.20667
3	WTX3	control-3	-0.773333	3.16333	-4.32333	8.72333	5.02667	7.81333	-9.14	-10.0967	-9.16333	-3.57333	2.26667
4	PBX1	test-1	0.573333	5.92	-1.99	8.99333	5.51667	9.92667	-6.68333	-7.67	-6.77333	-0.313333	4.24
5	PBX2	test-2	-0.15	5.75667	-2.75667	7.79333	4.93333	8.72667	-7.52	-8.49333	-7.54333	-1.33333	3.38333
6	PBX3	test-3	-0.33	5.11333	-3.02667	8.53	5.58	8.89333	-7.65333	-8.54	-7.68667	-2.32	3.39667
Mean ΔCt [group control]
No.	Name	Groups	Ryr2	Gnb3	Cox8b	Gpr37l1	Cdh11	Micu3	mt-Co2	mt-Atp6	mt-Co3	Nppb	Ucp3
1	WTX	control	-0.657778	3.57444	-4.06333	7.45444	4.32222	7.24889	-8.87667	-9.79889	-8.86889	-3.71889	1.80778
ΔΔCt
No.	Name	Groups	Ryr2	Gnb3	Cox8b	Gpr37l1	Cdh11	Micu3	mt-Co2	mt-Atp6	mt-Co3	Nppb	Ucp3
1	WTX1	control-1	-0.0288889	-0.404444	-0.09	-2.31111	-0.888889	-1.26222	-0.09	-0.0611111	-0.0811111	-0.0511111	-0.857778
2	WTX2	control-2	0.144444	0.815556	0.35	1.04222	0.184444	0.697778	0.353333	0.358889	0.375556	-0.0944444	0.398889
3	WTX3	control-3	-0.115556	-0.411111	-0.26	1.26889	0.704444	0.564444	-0.263333	-0.297778	-0.294444	0.145556	0.458889
4	PBX1	test-1	1.23111	2.34556	2.07333	1.53889	1.19444	2.67778	2.19333	2.12889	2.09556	3.40556	2.43222
5	PBX2	test-2	0.507778	2.18222	1.30667	0.338889	0.611111	1.47778	1.35667	1.30556	1.32556	2.38556	1.57556
6	PBX3	test-3	0.327778	1.53889	1.03667	1.07556	1.25778	1.64444	1.22333	1.25889	1.18222	1.39889	1.58889
Expression															Color	Regulation
No.	Name	Groups	Ryr2	Gnb3	Cox8b	Gpr37l1	Cdh11	Micu3	mt-Co2	mt-Atp6	mt-Co3	Nppb	Ucp3		Red	up(>2)
1	WTX1	control-1	1.02023	1.32358	1.06437		1.85175		1.06437	1.04327	1.05783	1.03606	1.81224		Blue	down(<0.5)
2	WTX2	control-2	0.904728	0.56819	0.784584	0.485579	0.879988	0.616521	0.782773	0.779765	0.770809	1.06765	0.758442		Black	no change
3	WTX3	control-3	1.08339	1.32971	1.19748	0.414979	0.613679	0.676216	1.20025	1.22925	1.22641	0.904031	0.727546
4	PBX1	test-1	0.425989	0.196751	0.23761	0.34415	0.436955	0.156282	0.218646	0.228634	0.233978	0.0943682	0.18528
5	PBX2	test-2	0.703305	0.220336	0.404254	0.79065	0.654692	0.359041	0.390483	0.404565	0.398996	0.191371	0.335514
6	PBX3	test-3	0.796763	0.34415	0.487452	0.474488	0.418188	0.31987	0.428292	0.417866	0.440672	0.379221	0.332427
Mean Expression
No.	Name	Groups	Ryr2	Gnb3	Cox8b	Gpr37l1	Cdh11	Micu3	mt-Co2	mt-Atp6	mt-Co3	Nppb	Ucp3
1	WTX组	control组	1	1	1	1	1	1	1	1	1	1	1
2	PBX组	test组	0.640238	0.236301	0.370701	1.19133	0.451314	0.43071	0.340429	0.344354	0.351433	0.221082	0.25869
		S	0.0906006	0.437905	0.210745	0.0499215	0.651672	0.0422105	0.212934	0.225854	0.230354	0.0867975	0.617525
			0.192835	0.0791757	0.127223	0.229604	0.131464	0.107554	0.111736	0.105623	0.109309	0.144821	0.0858605
